# Supplementary material for: Structure-based dynamic arrays in regulatory domains of sodium-calcium exchanger (NCX) isoforms
Source: PubMed Central journal article supplement (PMC5430519; doi:10.1038/s41598-017-01102-x), 2017-04-20

## Supplementary information

### Structure-based dynamic arrays in regulatory domains of sodium-calcium exchanger (NCX) isoforms

Moshe Giladi<sup>1,#</sup>, Su Youn Lee<sup>2,#</sup>, Yarden Ariely<sup>1</sup>, Yotam Teldan<sup>1</sup>, Rotem Granit<sup>1</sup>,  
Roi Strulovich<sup>1</sup>, Yoni Haitin<sup>1</sup>, Ka Young Chung<sup>2,\*</sup>, and Daniel Khananshvili<sup>1,\*</sup>

<sup>1</sup>Department of Physiology and Pharmacology, Tel-Aviv University, Tel-Aviv 69978,  
Israel

<sup>2</sup>School of Pharmacy, Sungkyunkwan University, Jangan-gu, Suwon, 440-746,  
South Korea

<sup>#</sup>These authors contributed equally to this work

\*Corresponding authors:

**Professor Ka Young Chung**  
School of Pharmacy, Sungkyunkwan University,  
Jangan-gu, Suwon, 16419, South Korea,  
E-mail [kychung2@skku.edu](mailto:kychung2@skku.edu)

**Professor Daniel Khananshvili**  
Department of Physiology and Pharmacology  
Sackler School of Medicine, Tel-Aviv University  
Ramat-Aviv, Tel-Aviv 69978, Israel  
Tel: 972-3-640-9961; Fax: 972-3-640-9113  
E-mail: [dhanan@post.tau.ac.il](mailto:dhanan@post.tau.ac.il)

***Running title:*** Isoform-specific regulatory modes in NCX2 and NCX3

## Supplementary figure legends

**Figure S1. Sequence coverage of NCX2-CBD12 and NCX3-CBD12.** (A) Peptic peptides of NCX2-CBD12 are displayed as blue bars. (B) Peptic peptides of NCX3-CBD12-AC are displayed as pink bars, peptic peptides of NCX3-CBD12-B are displayed as light-blue bars, and peptic peptides identical in both splice variants are displayed as blue bars.

**Figure S2. HDX-MS profiles of NCX2-CBD12 and NCX3-CBD12.** HDX-MS profiles of apo NCX2-CBD12 (A), Ca<sup>2+</sup>-bound NCX2-CBD12 (B), apo NCX3-CBD12-AC (C), Ca<sup>2+</sup>-bound NCX3-CBD12-AC (D), apo NCX3-CBD12-B (E), and Ca<sup>2+</sup>-bound NCX3-CBD12-B (F) at different deuterium uptake duration (as indicated) are overlaid on the models of the respective proteins.

**Figure S3. HDX-MS uptake plots of NCX2-CBD12 and NCX3-CBD12.** The uptake plots of selected peptides affected by Ca<sup>2+</sup> binding in NCX2 (A), NCX3-AC (B), and NCX3-B (C) are displayed. \* p < 0.05.

# Figure S1

## A NCX2-CBD12

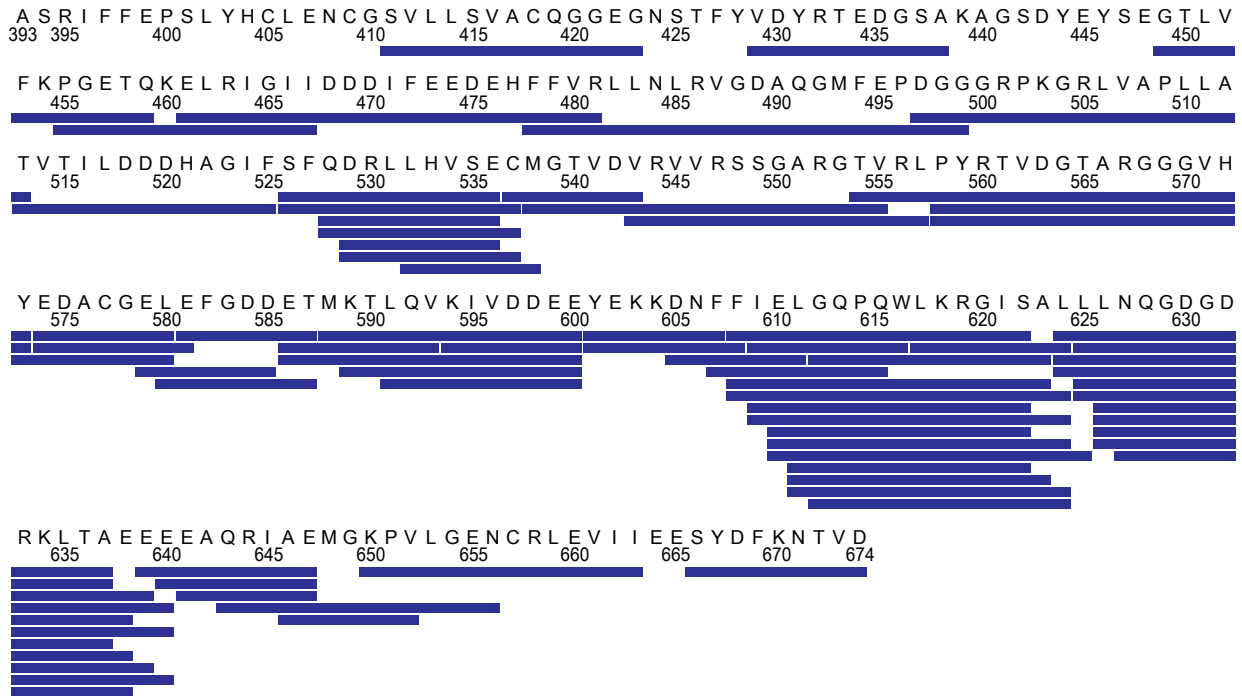

## B NCX3-CBD12-AC/B

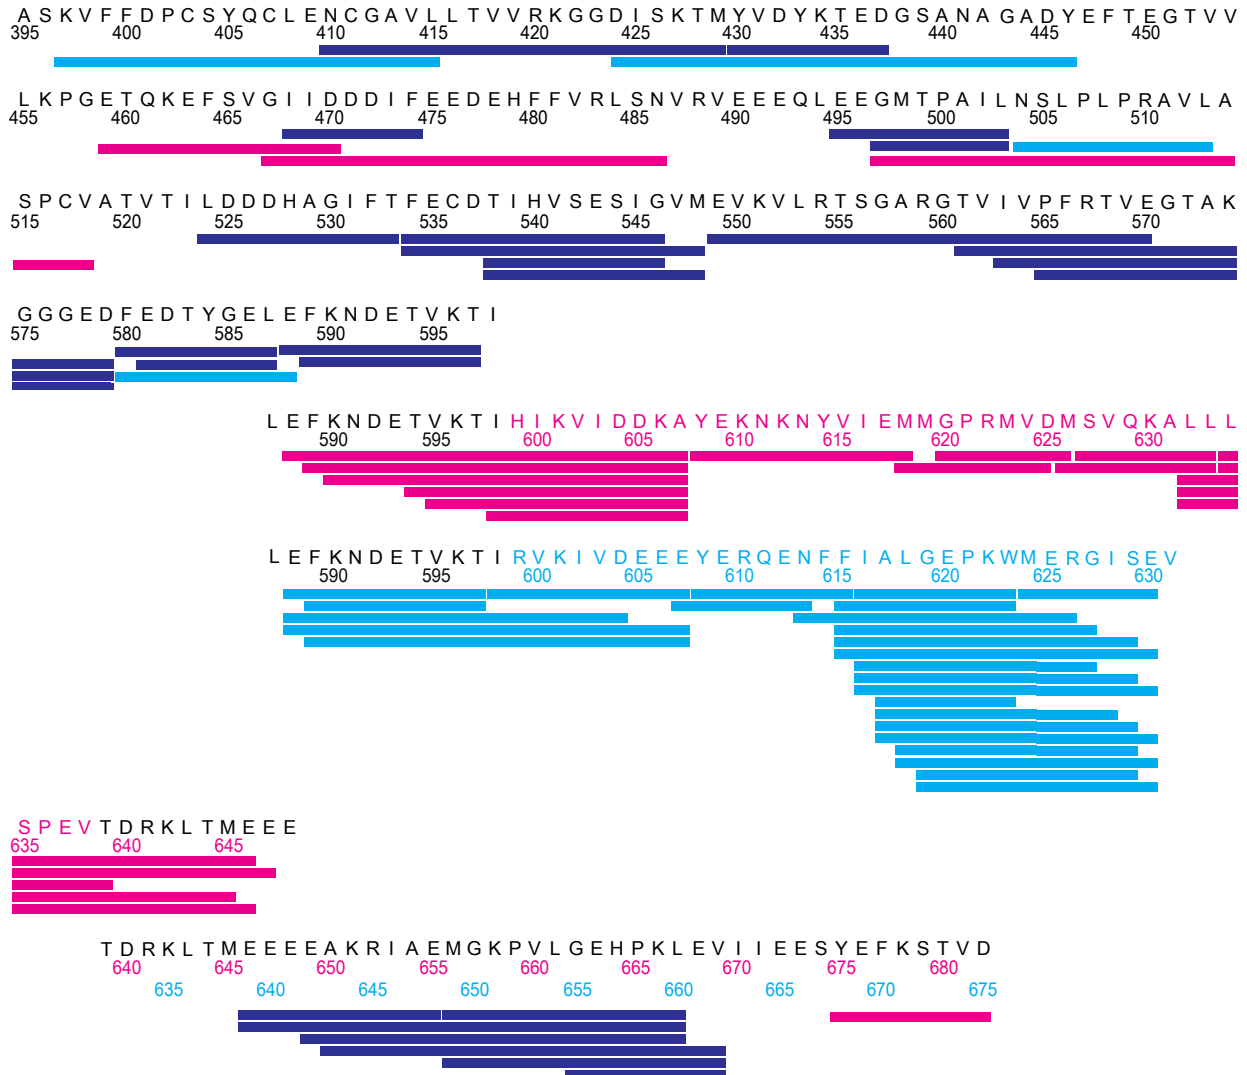

# Figure S2

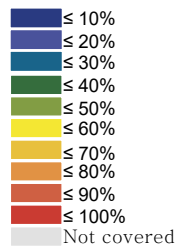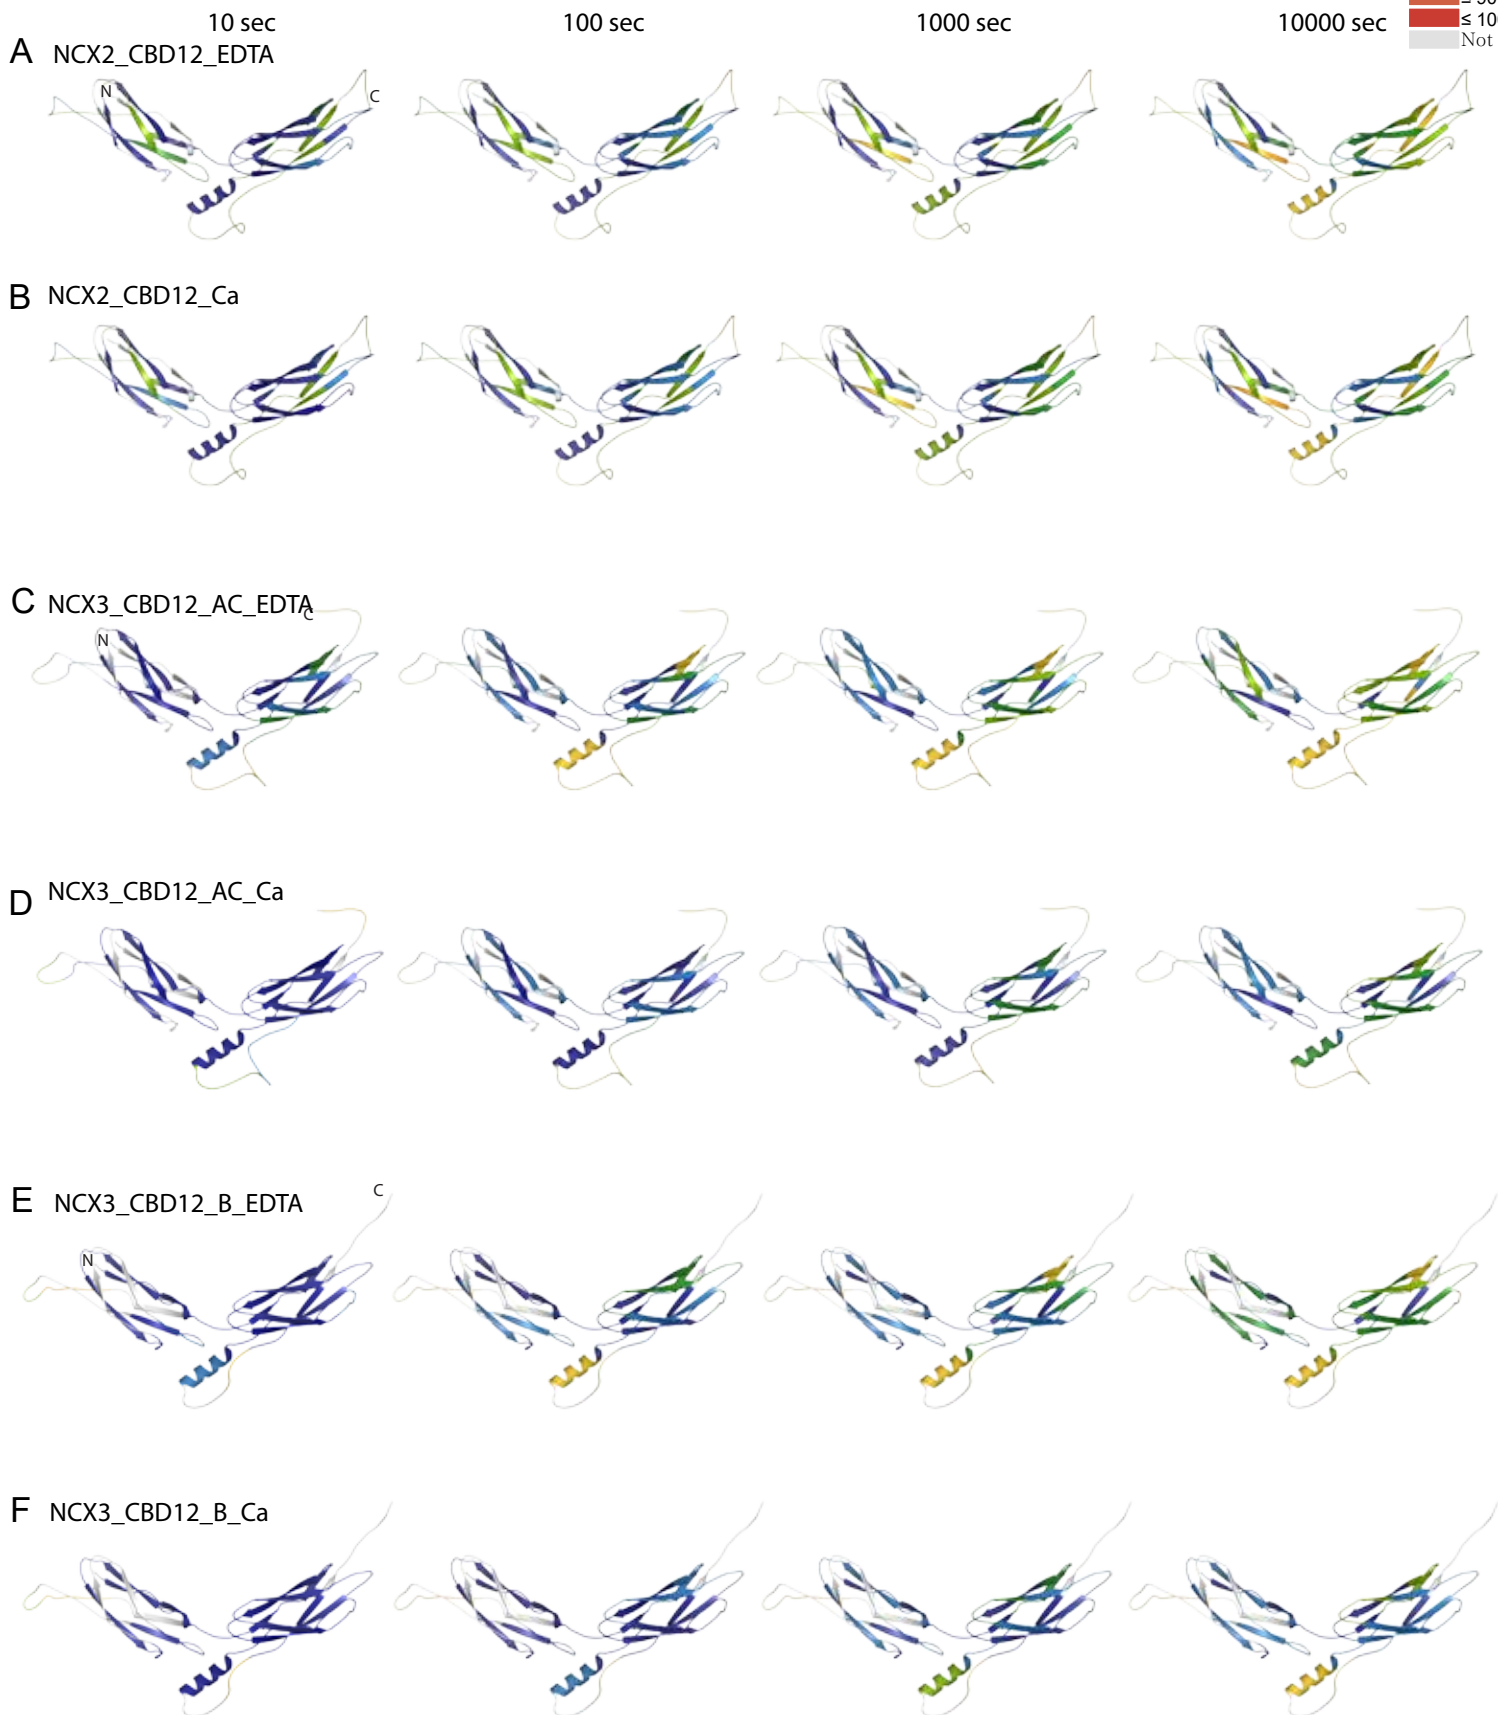

# NCX2\_CBD12

# Figure S3

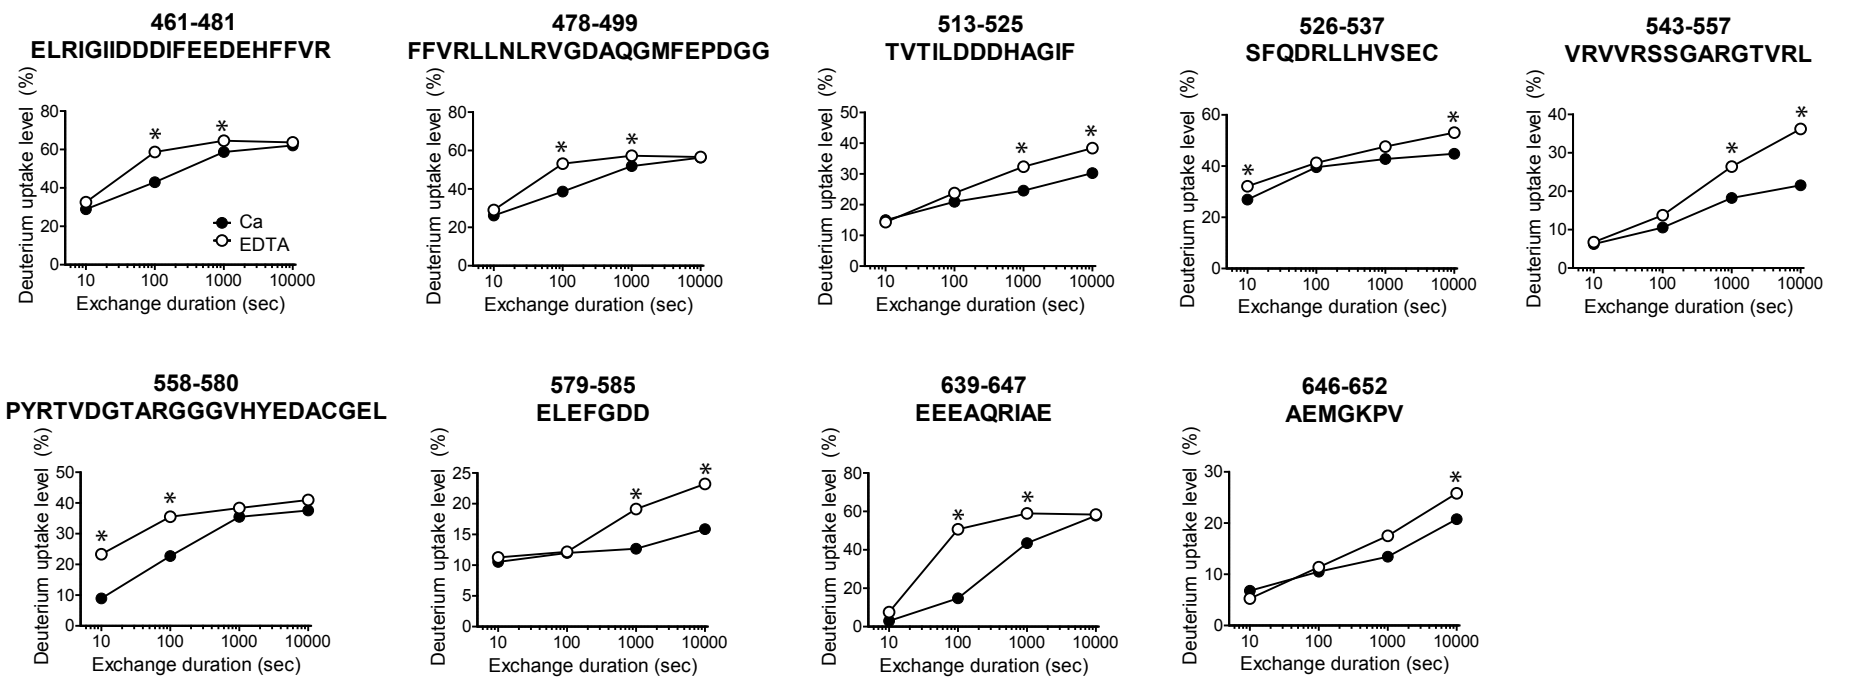

# NCX3\_CBD12\_AC

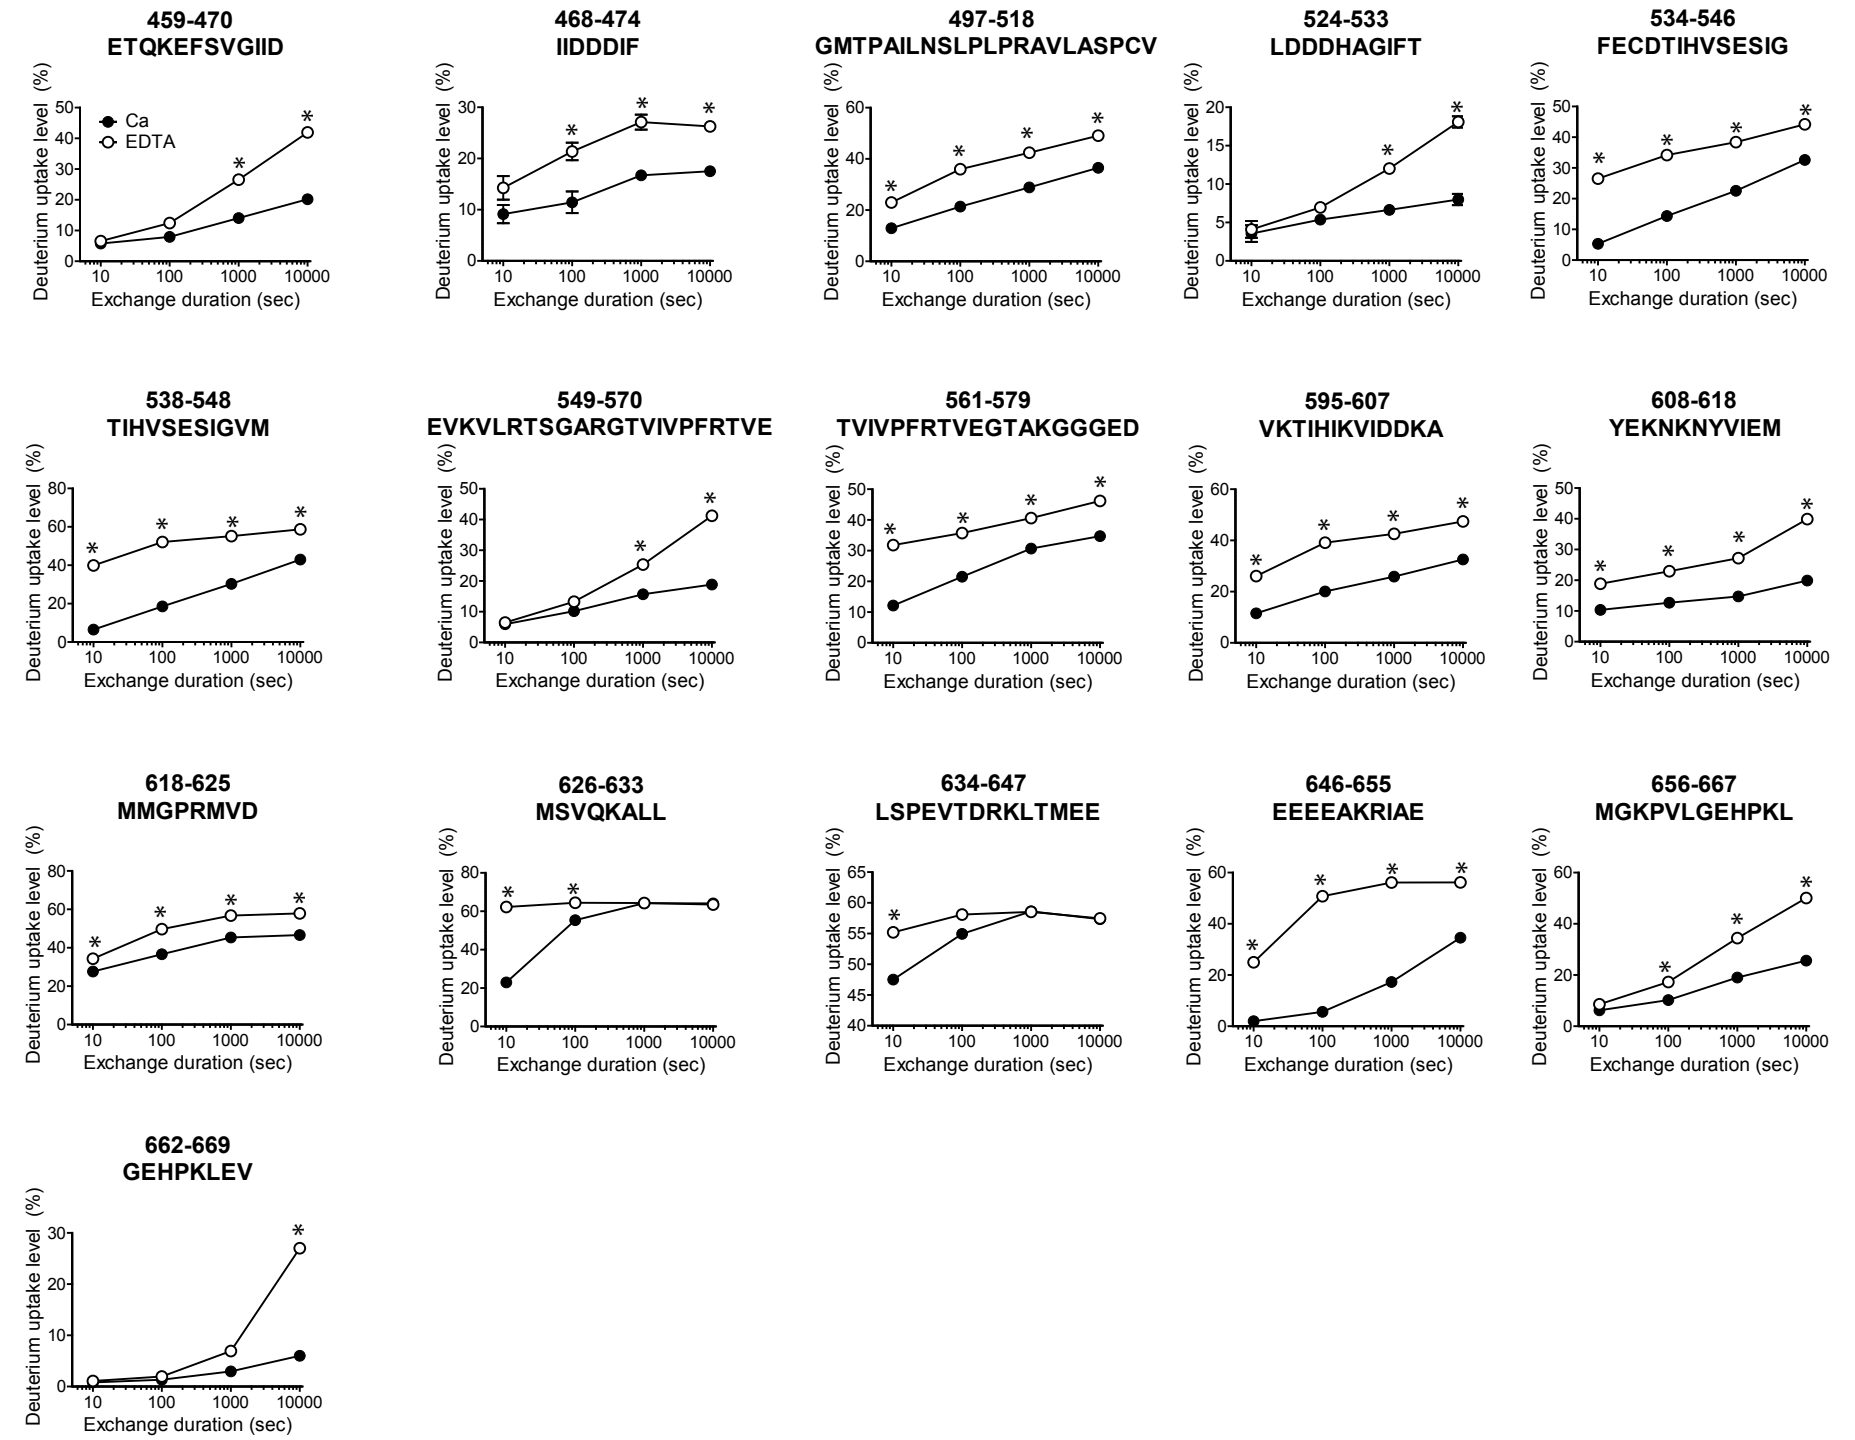

# NCX3\_CBD12\_B

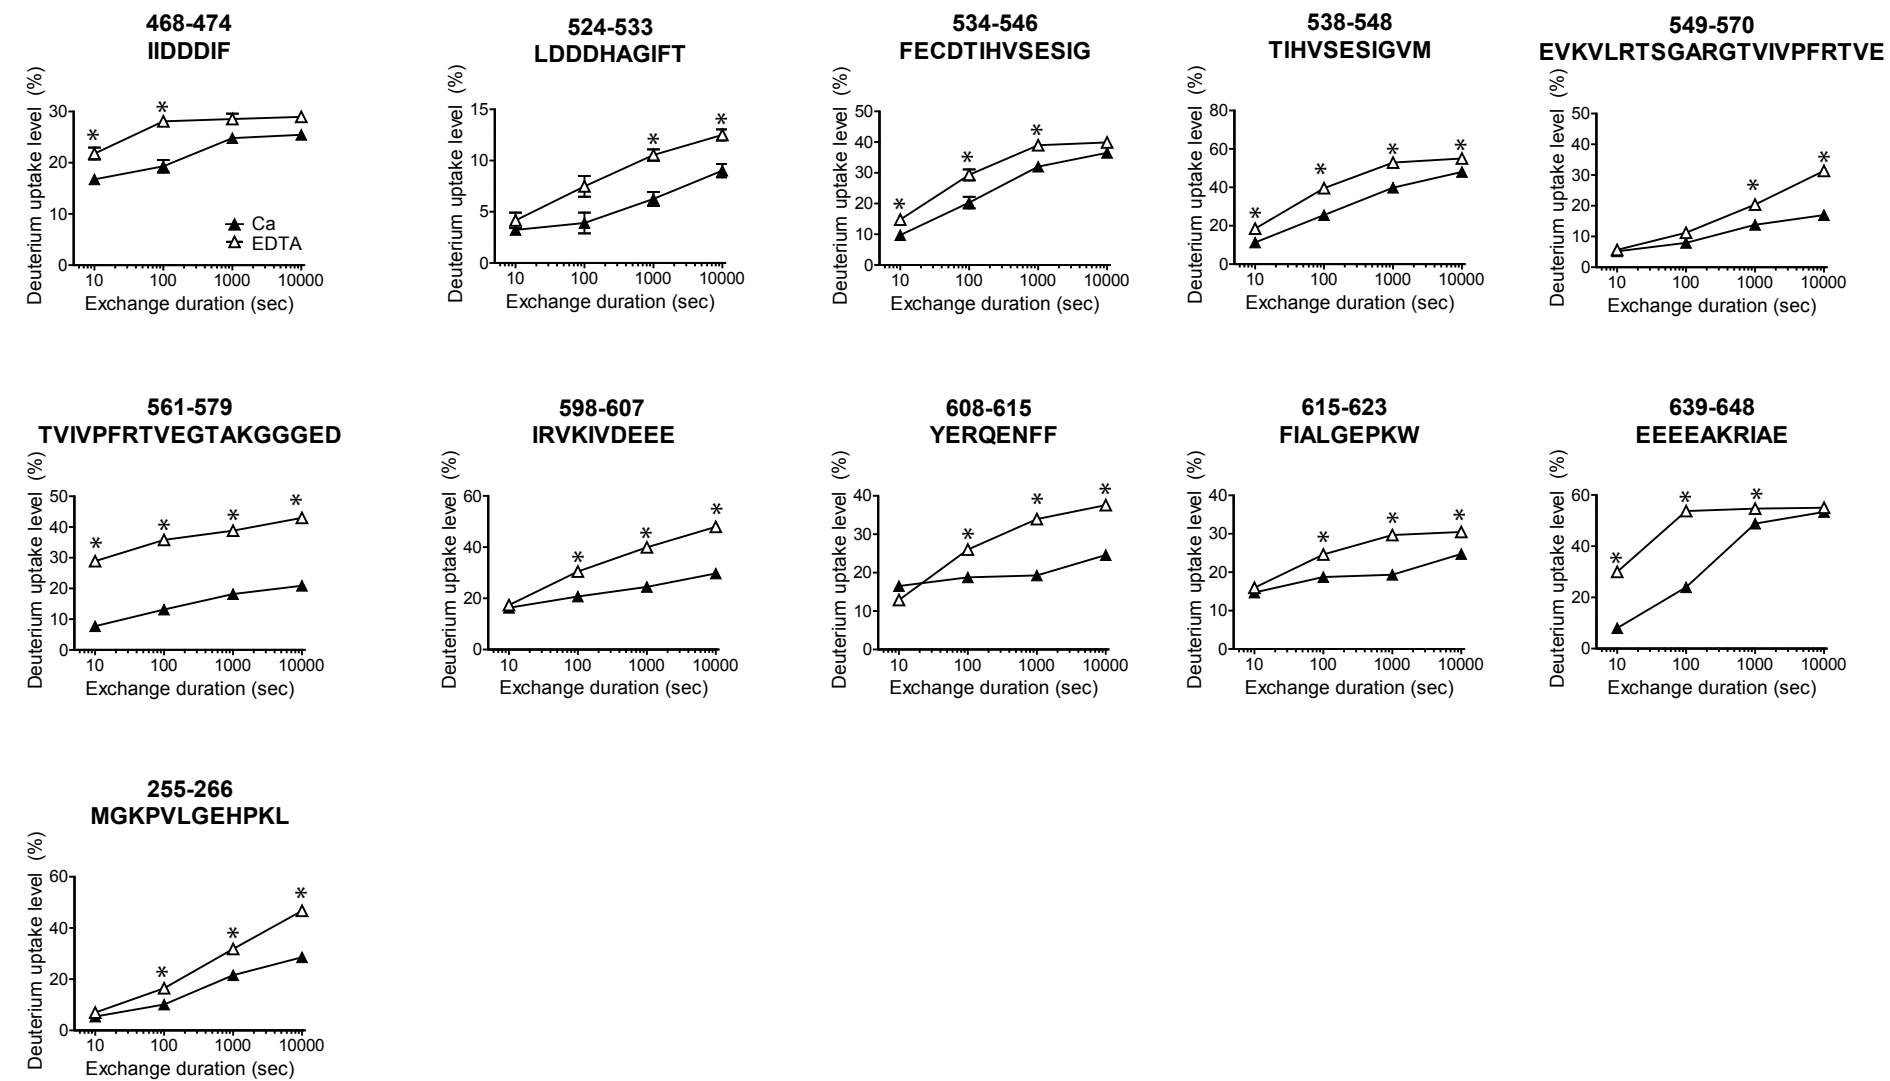

Supplement: 41598_2017_1102_MOESM1_ESM.pdf [file 41598_2017_1102_MOESM1_ESM.pdf]
